# Supplementary material for: Strong and bioactive gelatin–graphene oxide nanocomposites
Source: Royal Society of Chemistry journal article supplement (doi:10.1039/c1sm05321c), 2011-01-01
Supplement: c1sm05321c.pdf [file c1sm05321c.pdf]

# Strong and Bioactive Gelatin/Graphene Oxide Nanocomposites

**Chaoying Wan, Martin Frydrych, Biqiong Chen\***

*Trinity Centre for Bioengineering, Department of Mechanical and Manufacturing Engineering,  
Trinity College Dublin, College Green, Dublin 2, Ireland.*

\* To whom correspondence should be addressed. Tel +353 1 896 1729. Fax +353 1 679 5554.

E-mail address: [chenb@tcd.ie](mailto:chenb@tcd.ie)

## Supporting Information

Transmission electron microscopy (TEM) was carried out on a FEI Titan-Transmission Electron Microscope at 80 kV. The TEM specimen of gelatin/graphene oxide (GO) nanocomposite was sectioned by using the Focused Ion Beam with Cobra ion column system.

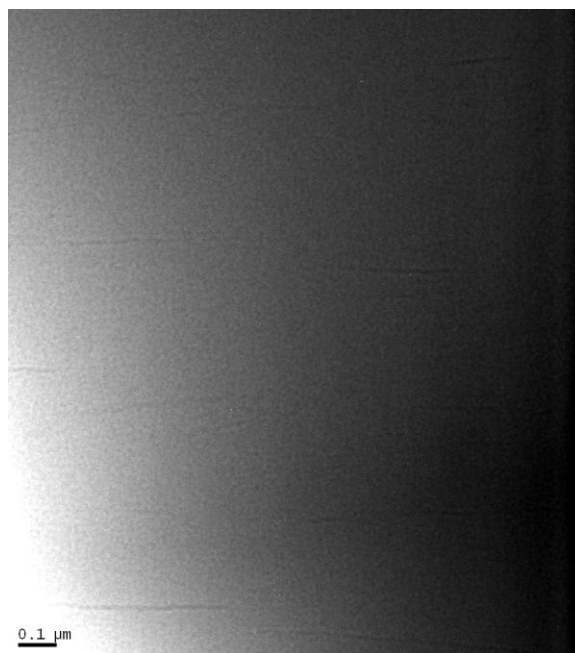

**Figure S1.** TEM image of gelatin/GO (1 wt%) nanocomposite showing single GO nanosheets.
